# Supplementary material for: Garambullo (Myrtillocactus geometrizans): effect of in vitro gastrointestinal digestion on the bioaccessibility and antioxidant capacity of phytochemicals
Source: Royal Society of Chemistry journal article supplement (doi:10.1039/d1fo04392g), 2022-01-01
Supplement: d1fo04392g1.pdf [file d1fo04392g1.pdf]

**Food & Function**  
**Supplementary Electronic Material**

**Garambullo (*Myrtillocactus geometrizans*): Effect of *in vitro* gastrointestinal digestion on the bioaccessibility and antioxidant capacity of phytochemicals**

Edelmira Sánchez-Recillas,<sup>a</sup> Rocio Campos-Vega,<sup>b</sup> Iza Fernanda Pérez-Ramírez,<sup>c</sup> Ivan Luzardo-Ocampo,<sup>d</sup> Mardey Liceth Cuéllar-Núñez,<sup>a</sup> Haydé Azeneth Vergara-Castañeda\*<sup>a</sup>

<sup>a</sup> Department of Biomedical Research, School of Medicine, Universidad Autónoma de Querétaro, Querétaro, 76076, Qro., Mexico

<sup>b</sup> Research and Graduate Studies in Food Science, School of Chemistry, Universidad Autónoma de Querétaro, Querétaro, 76000, Qro., Mexico.

<sup>c</sup> School of Chemistry, Universidad Autónoma de Querétaro, C.U., Cerro de las Campanas S/N, 76000, Querétaro, Qro., Mexico

<sup>d</sup> Instituto de Neurobiología, Universidad Nacional Autónoma de México (UNAM)-Campus Juriquilla, Juriquilla, 76230, Qro., Mexico.

## SUPPLEMENTARY MATERIAL

**Table S1. Quantification parameters of bioactive compounds by UPLC-ESI-QTOF MS.**

| Family                | Standard                      | Linear regression*  | Wavelength (nm) |
|-----------------------|-------------------------------|---------------------|-----------------|
| Flavanones            | Eriocitrin                    | $y = 84176x + 1931$ | 280             |
| Isoflavones           | Genistein                     | $y = 80831x + 1359$ | 254             |
| Flavonols             | Quercetin                     | $y = 42165x + 768$  | 360             |
| Hydroxybenzoic acids  | <i>p</i> -Hydroxybenzoic acid | $y = 15016x + 104$  | 280             |
| Hydroxycinnamic acids | Ferulic acid                  | $y = 38282x + 681$  | 320             |
| Betacyanins           | Betanin                       | $y = 32013x + 555$  | 538             |
| Betaxanthins          | Betanin                       | $y = 33842x + 503$  | 480             |
| Phytosterols          | Beta-sitosterol               | $y = 49312x + 626$  | 280             |
| Tocopherols           | Alpha-Tocopherol              | $y = 39145 + 479$   | 295             |

\*R<sup>2</sup> coefficient >0.98.
